# Supplementary material for: The effect of non-intrinsic factors on pulse discharge and energy releasing performance of dielectric ceramics
Source: Royal Society of Chemistry journal article supplement (doi:10.1039/d3tc01737k), 2023-01-01
Supplement: d3tc01737k1.pdf [file d3tc01737k1.pdf]

## Supplementary Materials

### Effect of non-intrinsic factors on pulse discharge and energy releasing performance of dielectric ceramics

Haochen Xie<sup>1</sup>, Yongping Pu<sup>1,2,\*</sup>, Yangchao Shang<sup>1</sup>, Lei Zhang<sup>2</sup>, Bo Wang<sup>2</sup>, Yuxing Hao<sup>2</sup>

<sup>1</sup>School of Electronic Information and Artificial Intelligence, Shaanxi University of Science and Technology, Xi'an 710021, Shaanxi, China

<sup>2</sup>School of Materials Science and Engineering, Shaanxi University of Science and Technology, Xi'an 710021, China

\* Corresponding author: Yongping Pu;

E-mail address: pypelectroceramic@sust.edu.cn

As show the Table S1, the test equipment type, samples size and resistance are different in different paper. And even, the mostly information is missing in several papers.

Table S1. Charge-discharge condition and  $t_{0.9}$  of recently developed energy storage ceramics

| Ref | Composition                                                                                                                                                                                     | Equipment type             | Samples Size | Over-damped resistance( $\Omega$ ) | $P_{\max}$ | $W_{\text{dis-max}}$                    | $t_{0.9}$    |
|-----|-------------------------------------------------------------------------------------------------------------------------------------------------------------------------------------------------|----------------------------|--------------|------------------------------------|------------|-----------------------------------------|--------------|
| 1   | (1-x)SrTiO <sub>3</sub> -<br>x(0.93Bi <sub>0.5</sub> Na <sub>0.5</sub> TiO <sub>3</sub> -<br>0.07Ba <sub>0.94</sub> Sm <sub>0.04</sub> Zr <sub>0.02</sub> Ti<br>0.98O <sub>3</sub> )            | CPR1701-100,<br>PloyK, USA | none         | 1000                               | none       | 1.1J/cm <sup>3</sup> (1<br>50kV/cm)     | 0.18 $\mu$ s |
| 2   | (1-<br>x)(0.75Na <sub>0.5</sub> Bi <sub>0.5</sub> TiO <sub>3</sub> -<br>0.25SrTiO <sub>3</sub> )-<br>xAg(Nb <sub>0.85</sub> Ta <sub>0.15</sub> )O <sub>3</sub>                                  | Self-built                 | none         | 628.5                              | none       | 0.16J/cm <sup>3</sup> (<br>10kV/cm)     | 340ns        |
| 3   | (1-<br>x)(0.65Bi <sub>0.5</sub> Na <sub>0.5</sub> TiO <sub>3</sub> -<br>0.35Bi <sub>0.1</sub> Sr <sub>0.85</sub> TiO <sub>3</sub> )-<br>x(K <sub>0.5</sub> Na <sub>0.5</sub> NbO <sub>3</sub> ) | Self-built                 | none         | 208                                | none       | 1.21J/cm <sup>3</sup> (<br>120MV/m<br>) | 1.01 $\mu$ s |

|           |                                                                                                                                                 |                                         |                                   |      |                              |                                                    |                   |
|-----------|-------------------------------------------------------------------------------------------------------------------------------------------------|-----------------------------------------|-----------------------------------|------|------------------------------|----------------------------------------------------|-------------------|
| 4         | $(1-x)(0.6\text{Bi}_{0.5}\text{Na}_{0.5}\text{TiO}_3-0.4\text{Sr}_{0.7}\text{Bi}_{0.2}\text{TiO}_3)-x\text{AgNbO}_3$                            | Tongguo instruments technology, CFD-001 | Thickness: 0.2mm<br>Diameter: 2mm | 300  | none                         | $1.50\text{J}/\text{cm}^3(120\text{kV}/\text{cm})$ | 194ns             |
| 5         | $0.9(\text{Sr}_{0.7}\text{Bi}_{0.2})\text{TiO}_3-0.1\text{Bi}(\text{Mg}_{0.5}\text{Me}_{0.5})\text{O}_3$<br>(Me = Ti, Zr, and Hf)               | CRP1701, PolyK                          | none                              | 2000 | none                         | $1.0\text{J}/\text{cm}^3(160\text{kV}/\text{cm})$  | $1.25\mu\text{s}$ |
| 6         | 0.95SBKT–0.05NN                                                                                                                                 | none                                    | none                              | 102  | $54.1\text{MW}/\text{cm}^3$  | $2.1\text{J}/\text{cm}^3(220\text{kV}/\text{cm})$  | $0.33\mu\text{s}$ |
| 7         | $0.98(\text{BNT-ST})-0.02\text{BaBi}_2\text{Nb}_2\text{O}_9$                                                                                    | Tongguo instruments technology, CFD-001 | none                              | 200  | $30.57\text{MW}/\text{cm}^3$ | $0.72\text{J}/\text{cm}^3(120\text{kV}/\text{cm})$ | $0.3\mu\text{s}$  |
| 8         | $0.9\text{BaTiO}_3-0.1(\text{Bi}_{0.9}\text{Na}_{0.1})(\text{In}_{0.8}\text{Zr}_{0.2})\text{O}_3$                                               | none                                    | none                              | 270  | none                         | $0.46\text{J}/\text{cm}^3(100\text{kV}/\text{cm})$ | $0.19\mu\text{s}$ |
| This work | $0.55\text{Bi}_{0.5}\text{Na}_{0.5}\text{TiO}_3-0.45\text{Ba}_{0.85}\text{Ca}_{0.15}\text{Ti}_{0.85}\text{Zr}_{0.15}\text{Sn}_{0.05}\text{O}_3$ | Tongguo instruments technology, CFD-003 | Thickness: 0.3mm<br>Diameter: 4mm | 100  | $17.5\text{MW}/\text{cm}^3$  | $0.23\text{J}/\text{cm}^3(100\text{kV}/\text{cm})$ | 143ns             |

## References

1. A. Jan, H. Liu, H. Hao, Z. Yao, M. Emmanuel, W. Pan, A. Ullah, A. Manan, A. Ullah, M. Cao and A. S. Ahmad, *J. Alloys Compd.* **830** (2020).
2. T. Li, P. Chen, F. Li and C. Wang, *Chem. Eng. J.* **406** (2021).
3. Z. Pan, D. Hu, Y. Zhang, J. Liu, B. Shen and J. Zhai, *Journal of Materials Chemistry C* **7** (14), 4072-4078 (2019).
4. X. Qiao, D. Wu, F. Zhang, B. Chen, X. Ren, P. Liang, H. Du, X. Chao and Z. Yang, *Journal of Materials Chemistry C* **7** (34), 10514-10520 (2019).
5. X. Kong, L. Yang, Z. Cheng and S. Zhang, *J. Am. Ceram. Soc.* **103** (3), 1722-1731 (2019).
6. P. Zhao, Z. Fang, X. Zhang, J. Chen, Y. Shen, X. Zhang, Q. An, C. Yang, X. Gao, S. Zhang and B. Tang, *ACS Appl Mater Interfaces* **13** (21), 24833-24855 (2021).
7. L. Zheng, P. Sun, P. Zheng, W. Bai, L. Li, F. Wen, J. Zhang, N. Wang and Y. Zhang, *Journal of Materials Chemistry C* **9** (15), 5234-5243 (2021).
8. F. Li, M. Zhou, J. Zhai, B. Shen and H. Zeng, *J. Eur. Ceram. Soc.* **38** (14), 4646-4652 (2018).
